# Supplementary material for: Adverse outcomes associated with opioid prescription for acute low back pain: a systematic review protocol
Source: Springer Nature journal article supplement (doi:10.1186/s13643-017-0556-x), 2017-08-14
Supplement: MOESM2 [file 14215284]

Appendix 1:

Data Extraction Form

Study ID: \_\_\_\_\_ Reviewer Initials: \_\_\_\_\_

Publication Details

Author (last name, first initial): \_\_\_\_\_ Year: \_\_\_\_\_

Title: \_\_\_\_\_

Journal: \_\_\_\_\_ Country: \_\_\_\_\_

Methods

Study design: \_\_\_\_\_ Study setting: \_\_\_\_\_

Length of study: \_\_\_\_\_

Description of sample: \_\_\_\_\_

Definition of ALBP: \_\_\_\_\_

Exposure: \_\_\_\_\_ Intervention (if applicable): \_\_\_\_\_

Demographics

Number of participants: Total: \_\_\_\_\_ Men: \_\_\_\_\_ Women: \_\_\_\_\_ Per group: \_\_\_\_\_

Mean age (SD): Total: \_\_\_\_\_ Men: \_\_\_\_\_ Women: \_\_\_\_\_

Per group: \_\_\_\_\_

Ethnicity: \_\_\_\_\_

Outcome measurements:

Efficacy outcome

Schober test: \_\_\_\_\_

Pain measurement: \_\_\_\_\_

Oswestry disability questionnaire:

\_\_\_\_\_

Modified Zung questionnaire:

\_\_\_\_\_

Modified somatic perception questionnaire:

\_\_\_\_\_

Adverse events outcome:

Incidence of misuse: \_\_\_\_\_

Opioid withdrawal symptoms:

\_\_\_\_\_

Physical adverse events: \_\_\_\_\_

Social adversity:

\_\_\_\_\_

Mortality: \_\_\_\_\_

Comments:

\_\_\_\_\_

Results

Statistical methods: \_\_\_\_\_ Adjusted for: \_\_\_\_\_

Coefficient: \_\_\_\_\_ 95% CI: \_\_\_\_\_ p-value: \_\_\_\_\_

Findings: \_\_\_\_\_

Limitations: \_\_\_\_\_

Inclusion Criteria

RCT or observational study design examining outcome of prescription opioid use for ALBP

Participants aged 18 years or older

Exclusion Criteria

Pilot or feasibility studies

Patients with comorbid use disorder

Additional Comments:

\_\_\_\_\_

\_\_\_\_\_
